# Supplementary material for: Accuracy of intraoral real-time navigation versus static, CAD/CAM-manufactured pilot drilling guides in dental implant surgery: an in vitro study
Source: PubMed Central journal article supplement (PMC9535055; doi:10.1186/s40729-022-00430-6), 2022-10-06
Supplement: 40729_2022_430_MOESM1_ESM.pdf [file 40729_2022_430_MOESM1_ESM.pdf]

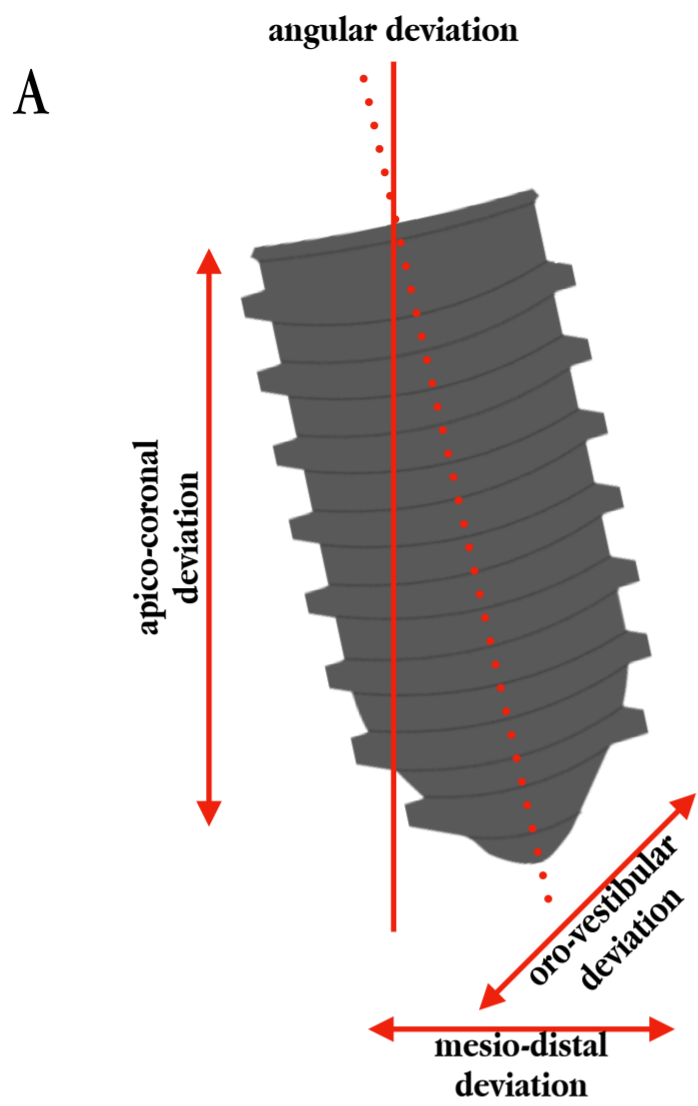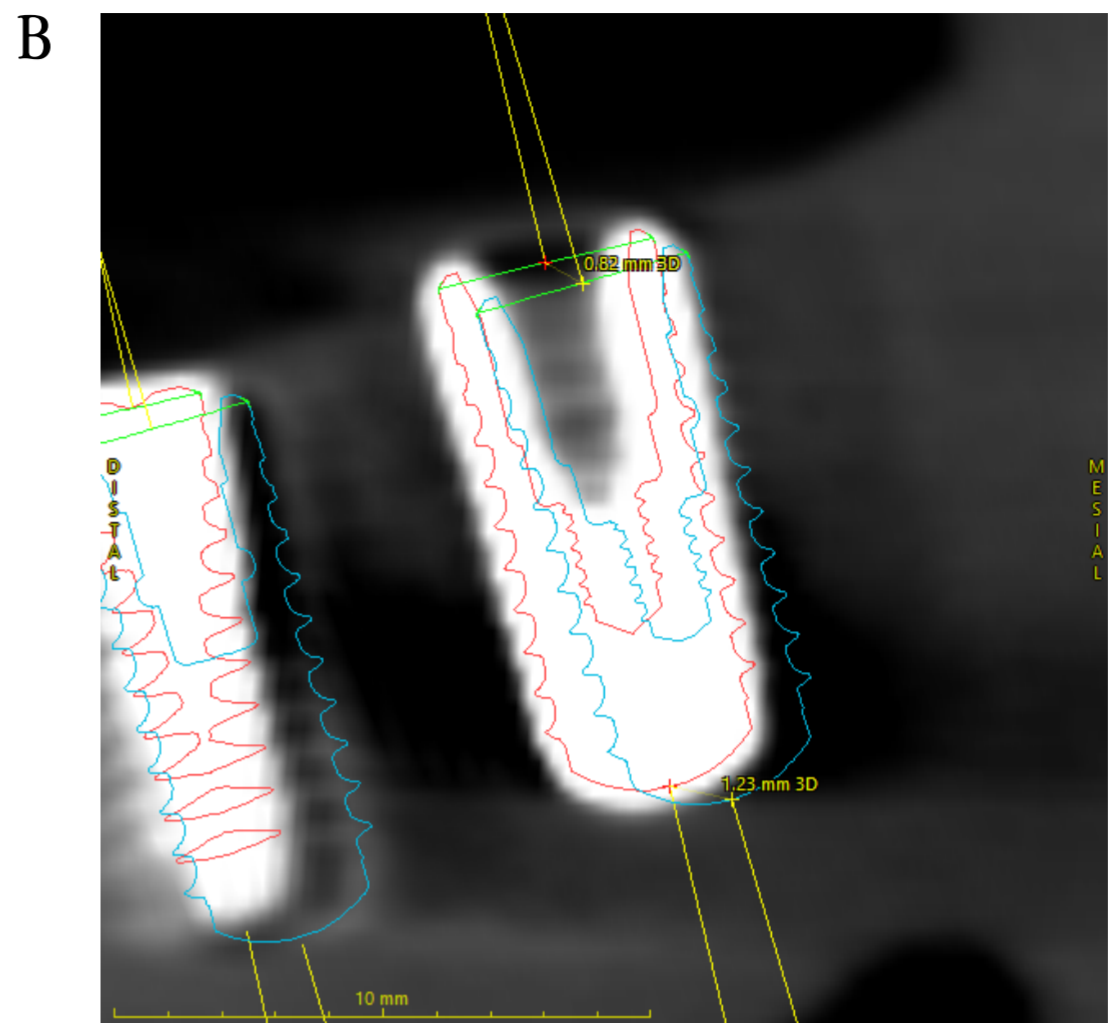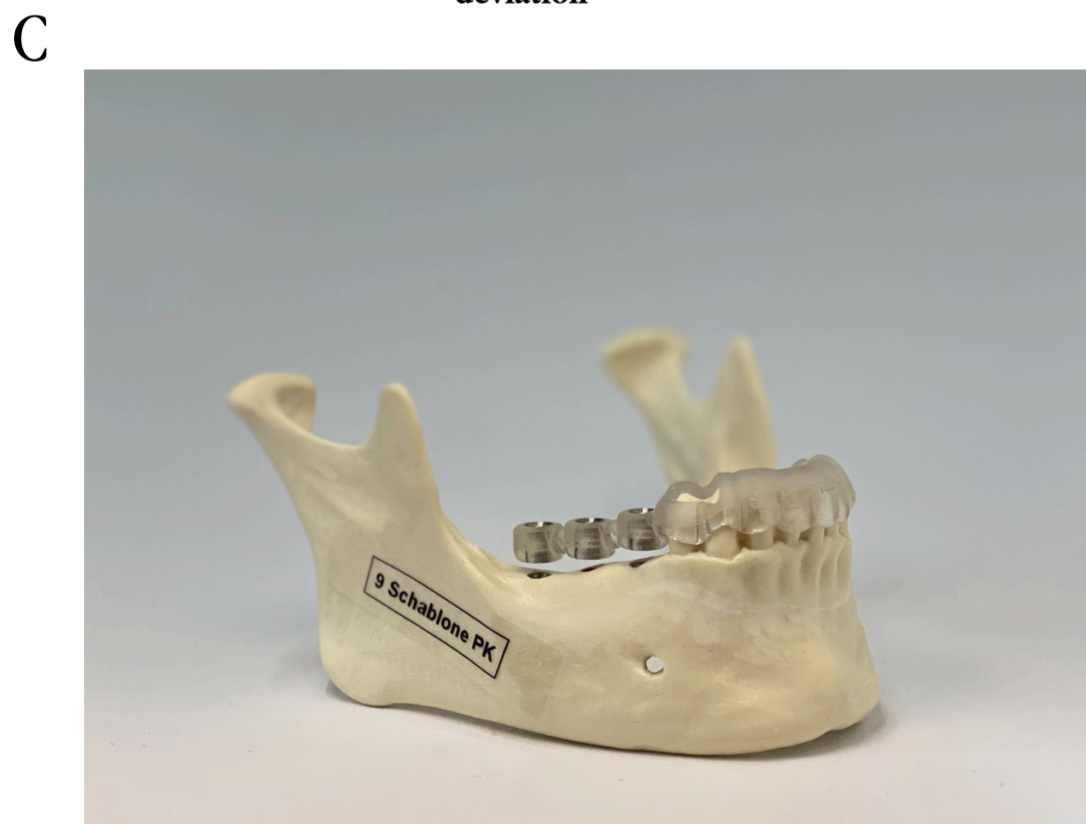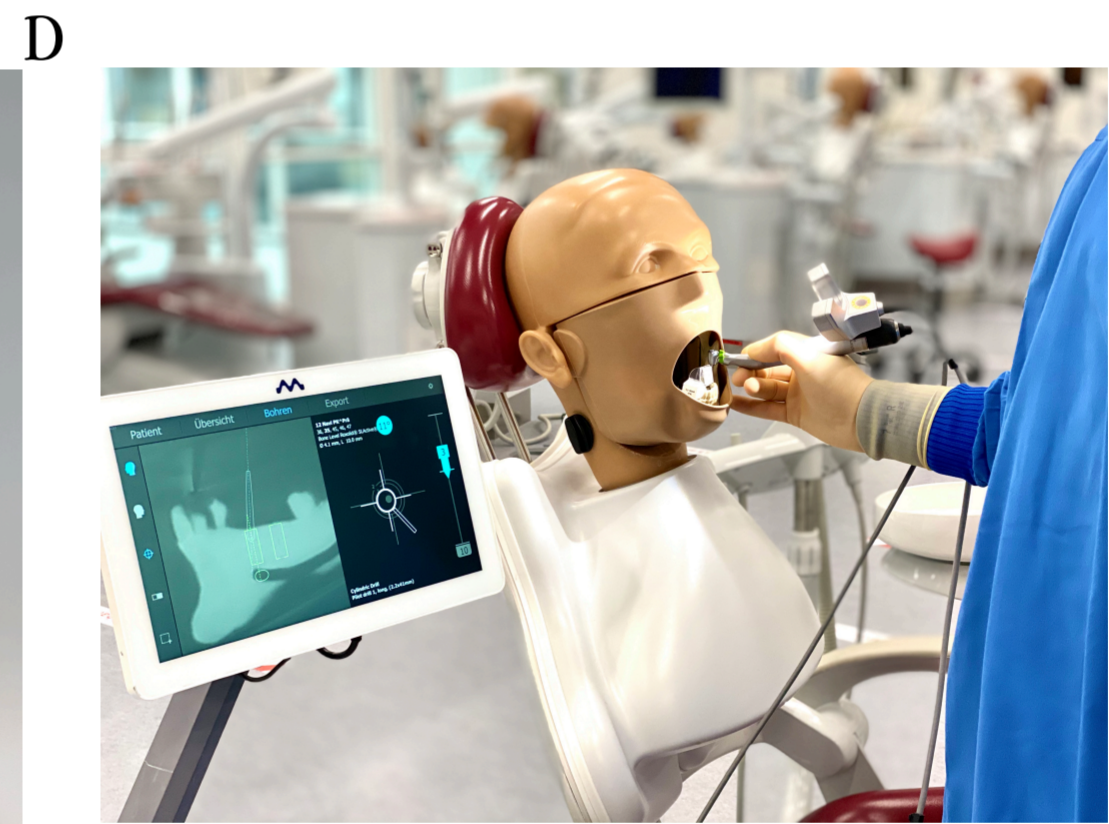

**E**

|                                  | drilling template | navigation |
|----------------------------------|-------------------|------------|
| angular deviation                | 4.6°              | 3°         |
| median horizontal deviation base | 0.34 mm           | 0.52 mm    |
| median horizontal deviation tip  | 0.59 mm           | 0.75 mm    |
| median vertical deviation base   | 0.275 mm          | 0.445 mm   |
| median vertical deviation tip    | 0.23 mm           | 0.43 mm    |
| median duration per implant      | 3.18 min          | 4.66 min   |

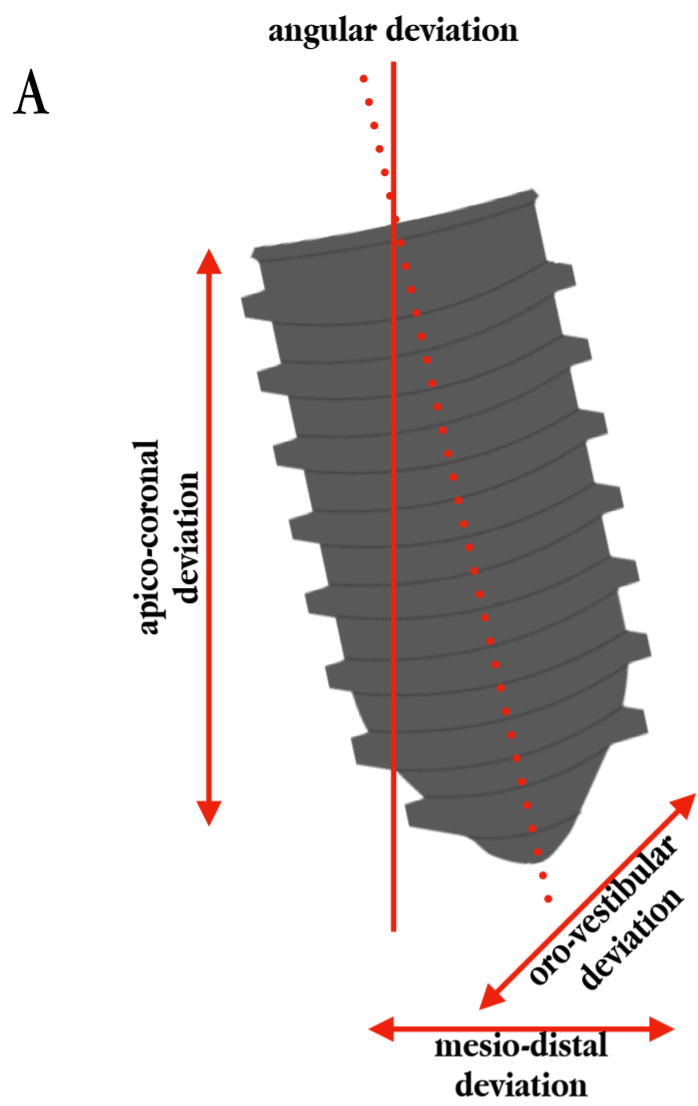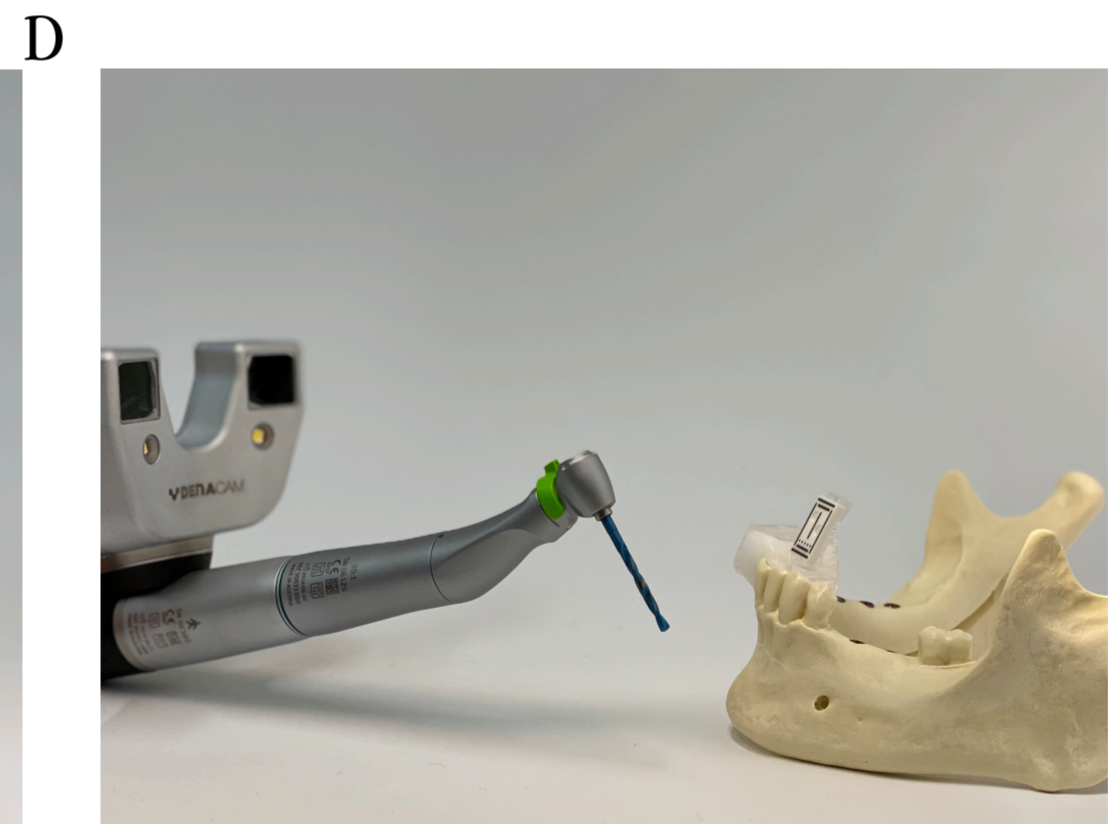

**E**

|                                  | drilling template | navigation |
|----------------------------------|-------------------|------------|
| angular deviation                | 4.6°              | 3°         |
| median horizontal deviation base | 0.34 mm           | 0.52 mm    |
| median horizontal deviation tip  | 0.59 mm           | 0.75 mm    |
| median vertical deviation base   | 0.275 mm          | 0.445 mm   |
| median vertical deviation tip    | 0.23 mm           | 0.43 mm    |
| median duration per implant      | 3.18 min          | 4.66 min   |
